# Supplementary material for: Substantial Alterations of the Cutaneous Bacterial Biota in Psoriatic Lesions
Source: PLoS One. 2008 Jul 23;3(7):e2719. doi: 10.1371/journal.pone.0002719 (PMC2447873; doi:10.1371/journal.pone.0002719)
Supplement: Table S2 — Representation of 366 bacterial SLOTUs in the human skin (0.84 MB DOC) [file pone.0002719.s002.doc]

**Table S2. Representation of 366 bacterial SLOTUs in the human skin**

| **Phylum** | **Species** | **Number of clones** | | | | |
| --- | --- | --- | --- | --- | --- | --- |
| **Normal subjects** | | **Subjects with psoriasis** | | **Total** |
| **NNT1a** | **NNT2b** | **PNc** | **PPd** |  |
| **Actinobacteria**  **(n=100)** | *Actinobaculum* AJ298658 93% |  |  |  | 1 | 1 |
| *Actinomyces* AF287749 |  |  | 1 |  | 1 |
|  | *Actinomyces* AF385553 | 1 |  | 3 |  | 4 |
| *Actinomyces* AJ635359 |  |  |  | 1 | 1 |
| *Actinomyces* AY349365 |  |  | 1 |  | 1 |
| *Actinomyces naeslundii* | 4 |  |  | 2 | 6 |
| *Actinomyces neuii* | 7 | 1 |  | 2 | 10 |
| *Actinomyces odontolyticus* |  | 1 |  | 2 | 3 |
| *Actinomycetales* AY770698 | 19 | 6 | 8 | 2 | 35 |
| *Arsenicicoccus bolidensis* |  | 1 |  |  | 1 |
| *Atopobium* AY959044 |  |  |  | 1 | 1 |
| *Atopobium vaginae* | 3 |  |  |  | 3 |
| *Bifidobacterium* AF275882 |  |  | 1 |  | 1 |
| *Bifidobacterium longum biovar Longum* |  |  |  | 1 | 1 |
| *Blastococcus* AY234675 91% | 2 |  |  |  | 2 |
| *Brevibacterium* X93594 94% |  |  | 1 | 1 | 2 |
| *Brevibacterium casei* |  |  |  | 1 | 1 |
| *Brevibacterium paucivorans* | 3 |  | 1 | 2 | 6 |
| *Candidatus Nostocoida limicola* | 1 |  |  |  | 1 |
| *Corynebacterium* AF227828 |  |  | 2 | 3 | 5 |
| *Corynebacterium* AF537601 96% | 2 |  |  |  | 2 |
| *Corynebacterium* X84253 | 1 |  |  |  | 1 |
| *Corynebacterium accolens* | 2 | 4 |  | 6 | 12 |
| *Corynebacterium* AF115937 |  |  | 2 |  | 2 |
| *Corynebacterium* AF227854 |  |  | 5 | 3 | 8 |
| *Corynebacterium* AF543288 | 1 |  |  |  | 1 |
| *Corynebacterium afermentans* | 4 | 3 | 1 | 7 | 15 |
| *Corynebacterium* AJ438050 95% |  |  | 1 | 4 | 5 |
| *Corynebacterium* AJ439345 95% | 1 |  |  |  | 1 |
| *Corynebacterium amycolatum* | 23 |  | 16 | 22 | 61 |
| *Corynebacterium appendicis* | 7 | 3 | 2 | 5 | 17 |
| *Corynebacterium aurimucosum* | 3 |  | 4 | 3 | 10 |
| *Corynebacterium* AY244774 94% |  |  |  | 1 | 1 |
| *Corynebacterium* AY581888 | 2 |  |  |  | 2 |
| *Corynebacterium* AY880057 |  |  |  | 1 | 1 |
| *Corynebacterium coyleae* | 2 |  |  |  | 2 |
| *Corynebacterium durum* | 3 | 2 |  | 1 | 6 |
| *Corynebacterium glaucum* | 1 |  |  |  | 1 |
| *Corynebacterium glucuronolyticum* | 6 |  |  |  | 6 |
| *Corynebacterium imitans* | 9 |  |  |  | 9 |
| *Corynebacterium jeikeium* | 14 | 2 | 16 | 12 | 44 |
| *Corynebacterium kroppenstedtii* | 10 | 7 | 2 | 3 | 22 |
| *Corynebacterium lipophiloflavum* | 2 |  |  |  | 2 |
| *Corynebacterium macginleyi* |  |  | 1 |  | 1 |
| *Corynebacterium matruchotii* | 2 |  |  |  | 2 |
| *Corynebacterium minutissimum* | 6 |  | 6 | 4 | 16 |
| *Corynebacterium mucifaciens* | 29 | 3 | 14 | 9 | 55 |
| *Corynebacterium nigricans* | 6 | 2 | 2 |  | 10 |
| *Corynebacterium pseudodiphthericum* | 1 |  |  |  | 1 |
| *Corynebacterium simulans* | 8 | 2 | 27 | 45 | 82 |
| *Corynebacterium singulare* | 5 | 2 | 2 | 3 | 12 |
| *Corynebacterium sundsvallense* | 3 |  |  |  | 3 |
| *Corynebacterium thomssenii* |  | 2 |  |  | 2 |
| *Corynebacterium tuberculostearicum* | 78 | 27 | 71 | 150 | 326 |
| *Corynebacterium urealyticum* |  |  | 3 |  | 3 |
| *Corynebacterium* X81872 | 1 |  |  | 1 | 2 |
| *Corynebacterium* Y10077 96% |  |  | 1 | 1 | 2 |
| *Dermabacter hominis* |  |  | 6 | 10 | 16 |
| *Dermacoccus* AF409025 95% | 9 | 4 |  |  | 13 |
| *Gardnerella vaginalis* | 3 | 3 |  |  | 6 |
| *Gordonia bronchialis* | 4 |  |  |  | 4 |
| *Gordonia sputi* | 4 | 2 |  |  | 6 |
| *Gordonia terrae* | 3 | 1 |  |  | 4 |
| *Janibacter melonis* | 1 |  |  |  | 1 |
| *Kocuria carniphila* |  |  |  | 2 | 2 |
| *Kocuria kristinae* |  |  | 2 | 4 | 6 |
| *Kocuria marina* | 1 | 4 |  | 4 | 9 |
| *Kocuria palustris* | 2 |  |  | 1 | 3 |
| *Kocuria rhizophila* | 8 | 1 |  | 13 | 22 |
| *Microbacterium lacticum* |  | 1 |  |  | 1 |
| *Dermacoccus* AF409025 | 1 | 47 |  | 19 | 67 |
| *Micrococcus* DQ513327 97% |  |  |  | 6 | 6 |
| *Micrococcus luteus* | 6 | 22 | 1 | 23 | 52 |
| *Microlunatus phosphovorus* | 1 |  |  |  | 1 |
| *Mobiluncus curtisii subsp. holmesii* | 1 |  |  |  | 1 |
| *Mycobacterium chlorophenolicum* | 1 |  |  |  | 1 |
| *Mycobacterium obuense* | 2 |  |  |  | 2 |
| *Nakamurella multipartita* | 2 |  |  |  | 2 |
| *Propionibacteriaceae* AF285117 |  |  | 4 |  | 4 |
| *Propionibacterium* AB042290 |  | 1 |  |  | 1 |
| *Propionibacterium* AB108480 |  |  |  | 1 | 1 |
| *Propionibacterium acnes* | 252 | 159 | 72 | 33 | 516 |
| *Propionibacterium granulosum* | 10 | 1 | 1 | 1 | 13 |
| *Propionibacterium* Y17821 | 6 |  | 3 | 2 | 11 |
| *Rhodococcus corynebacterioides* | 7 | 3 |  |  | 10 |
| *Rhodococcus erythropolis* | 5 | 9 | 1 | 20 | 35 |
| *Rothia aeria* | 1 |  |  | 2 | 3 |
| *Rothia amarae* |  |  | 2 | 3 | 5 |
| *Rothia dentocariosa* | 1 | 1 |  | 4 | 6 |
| *Rothia mucilaginosa* | 18 | 2 | 1 | 39 | 60 |
| *Rothia nasimurium* | 2 |  |  |  | 2 |
| *Rubrobacter xylanophilus* |  |  |  | 1 | 1 |
| *Tetrasphaera elongata* | 1 |  |  |  | 1 |
| *Tsukamurella pulmonis* |  | 10 |  |  | 10 |
| *Tsukamurella tyrosinosolvens* | 3 | 1 |  |  | 4 |
| *Turicella otitidis* |  |  | 4 | 1 | 5 |
| *Varibaculum cambriense* |  |  |  | 1 | 1 |
| *Zimmermannella* AB012589 97% |  |  | 1 | 1 | 2 |
| *Zimmermannella alba* |  |  | 1 |  | 1 |
| *Zimmermannella* AJ251780 | 1 |  |  |  | 1 |
| **Subtotal** | **628** | **340** | **293** | **491** | **1752** |
| **Bacteroidetes**  **(n=29)** | *Bacteroidales* AF385513 | 2 |  |  |  | 2 |
| *Bacteroidales* AY349402 |  |  |  | 3 | 3 |
|  | *Bacteroides vulgatus* |  |  |  | 4 | 4 |
| *Capnocytophaga* AF385569 |  |  |  | 1 | 1 |
| *Chitinophaga* AJ318177 88% | 1 |  |  |  | 1 |
| *Chryseobacterium* AJ619057 96% |  | 2 |  |  | 2 |
| *Chryseobacterium* DQ314741 |  | 5 |  |  | 5 |
| *Chryseobacterium meningosepticum* |  |  |  | 1 | 1 |
| *Flavobacteriaceae* AY958777 93% |  |  |  | 2 | 2 |
| *Flavobacteriaceae* DQ337018 |  | 10 | 7 | 25 | 42 |
| *Flavobacteriaceae* AF502204 | 1 |  |  |  | 1 |
| *Flavobacteriaceae* DQ256356 95% |  | 2 | 11 | 15 | 28 |
| *Flexibacteraceae* AY279982 87% | 1 |  |  |  | 1 |
| *Flexibacteraceae* AM000023 85% |  | 7 |  |  | 7 |
| *Flexibacteraceae* AM000023 91% |  | 1 |  |  | 1 |
| *Flexibacteraceae* AM000023 89% |  | 2 |  |  | 2 |
| *Hymenobacter* D84607 93% | 2 |  |  |  | 2 |
| *Porphyromonas* L16493 86% | 1 |  |  |  | 1 |
| *Porphyromonas* AY008310 |  |  |  | 4 | 4 |
| *Porphyromonas* AY008313 | 1 |  |  |  | 1 |
| *Porphyromonas uenonis* |  |  |  | 1 | 1 |
| *Prevotella* AY207061 | 1 |  |  |  | 1 |
| *Prevotella* AY323525 | 1 |  |  |  | 1 |
| *Prevotella* AY880052 |  |  |  | 1 | 1 |
| *Prevotella bivia* | 1 |  |  |  | 1 |
| *Prevotella corporis* | 1 |  |  | 1 | 2 |
| *Prevotella disiens* | 2 |  |  | 1 | 3 |
| *Prevotella* L16476 93% | 1 |  |  |  | 1 |
| *Prevotella melaninogenica* | 3 |  |  | 1 | 4 |
| **Subtotal** | **19** | **29** | **18** | **60** | **126** |
| **Cyanobacteria**  **(n=3)** | *Cyanobacteria* AJ538357 94% | 2 | 1 |  |  | 3 |
| *Cyanobacteria* AY853673 83% |  | 3 |  |  | 3 |
|  | *Cyanobacteria* DQ330752 96% |  |  | 1 |  | 1 |
| **Subtotal** | **2** | **4** | **1** |  | **7** |
| **Deinococcus**  **(n=6)** | *Deinococcus* AE002076 91% | 2 | 2 |  |  | 4 |
| *Deinococcus*  AJ549111 91% | 29 | 2 |  |  | 31 |
|  | *Deinococcus* Y11329 90% | 4 | 8 |  |  | 12 |
| *Deinococcus* AY743261 93% |  | 2 |  |  | 2 |
| *Deinococcus grandis* |  | 2 |  |  | 2 |
| *Deinococcus radiodurans* |  | 2 |  |  | 2 |
| **Subtotal** | **35** | **18** |  |  | **53** |
| **Firmicutes**  **(n=103)** | *Abiotrophia defectiva* |  | 2 |  | 1 | 3 |
| *Acidaminococcaceae* DQ057390 |  |  |  | 2 | 2 |
|  | *Aerococcus viridans* |  |  |  | 3 | 3 |
| *Anaerococcus* AF408269 96% |  |  |  | 2 | 2 |
| *Anaerococcus* AF542229 |  | 1 |  |  | 1 |
| *Anaerococcus* AF542229 97% |  |  |  | 1 | 1 |
| *Anaerococcus* AY958786 |  |  |  | 1 | 1 |
| *Anaerococcus* AY958800 96% |  |  |  | 2 | 2 |
| *Anaerococcus* AY958800 97% | 1 |  | 1 |  | 2 |
| *Anaerococcus* AY958826 |  | 2 |  | 2 | 4 |
| *Anaerococcus* AY958901 |  |  |  | 3 | 3 |
| *Anaerococcus* AY959168 | 6 | 3 |  | 6 | 15 |
| *Anaerococcus* AY981208 | 1 |  | 1 | 7 | 9 |
| *Anaerococcus* DQ130021 92% |  |  | 1 |  | 1 |
| *Anaerococcus* DQ130021 | 1 |  | 1 | 1 | 3 |
| *Anaerococcus octavius* |  |  | 1 | 1 | 2 |
| *Anaerococcus prevotii* | 2 |  |  |  | 2 |
| *Anaerococcus* Y07841 95.3% |  | 2 |  |  | 2 |
| *Anaerococcus* Y07841 95.7% |  |  | 3 | 3 | 6 |
| *Anaerovorax* AJ251215 90% |  |  | 2 | 3 | 5 |
| *Brevibacillus* AJ715380 96% |  |  | 2 |  | 2 |
| *Carnobacterium* AJ427446 | 10 |  |  |  | 10 |
| *Clostridiaceae* AY916293 |  |  |  | 3 | 3 |
| *Clostridiaceae* AY976048 |  |  | 3 |  | 3 |
| *Clostridiales* AF287775 |  | 2 |  |  | 2 |
| *Clostridiales* AF385510 |  |  |  | 1 | 1 |
| *Dialister* DQ130020 | 2 |  |  | 1 | 3 |
| *Dialister invisus* |  |  |  | 1 | 1 |
| *Dorea longicatena* |  |  | 1 | 1 | 2 |
| *Enterococcus faecalis* | 2 |  |  |  | 2 |
| *Eremococcus coleocola* | 1 | 1 |  |  | 2 |
| *Eubacteriaceae* AY821870 96% |  |  |  | 4 | 4 |
| *Facklamia hominis* | 5 |  |  |  | 5 |
| *Facklamia languida* | 2 |  |  |  | 2 |
| *Faecalibacterium* AY976035 |  |  |  | 2 | 2 |
| *Filifactor alocis* |  |  |  | 1 | 1 |
| *Finegoldia* AB109769 | 16 | 2 |  | 12 | 30 |
| *Firmicutes* AF527773 |  |  |  | 1 | 1 |
| *Gemella haemolysans* | 1 | 5 | 1 | 20 | 27 |
| *Gemella morbillorum* | 1 |  |  | 1 | 2 |
| *Gemella sanguinis* | 1 |  |  | 6 | 7 |
| *Granulicatella adiacens* |  | 2 |  | 15 | 17 |
| *Granulicatella elegans* | 3 |  | 1 |  | 4 |
| *Jeotgalicoccus* AY188939 |  |  |  | 3 | 3 |
| *Lachnospira* AY977894 |  | 1 |  |  | 1 |
| *Lachnospiraceae* AY975275 |  |  |  | 2 | 2 |
| *Lachnospiraceae* AY983852 |  |  |  | 1 | 1 |
| *Lactobacillus crispatus* | 9 |  |  |  | 9 |
| *Lactobacillus delbrueckii subsp. bulgaricus* |  | 1 |  |  | 1 |
| *Lactobacillus jensenii* | 3 |  |  |  | 3 |
| *Lactobacillus sp.* | 2 |  |  | 2 | 4 |
| *Leuconostoc argentinum* | 1 |  |  | 5 | 6 |
| *Macrococcus* AY119686 92% |  |  |  | 1 | 1 |
| *Papillibacter* U81642 |  |  | 1 |  | 1 |
| *Peptoniphilus* AF481225 |  |  |  | 2 | 2 |
| *Peptoniphilus* AY958780 96% |  |  |  | 1 | 1 |
| *Peptoniphilus harei* | 3 |  | 2 | 9 | 14 |
| *Peptoniphilus lacrimalis* |  |  | 1 |  | 1 |
| *Peptoniphilus* X90471 88% |  |  |  | 9 | 9 |
| *Peptoniphilus* Y07840 93% | 1 |  |  |  | 1 |
| *Peptostreptococcus anaerobius* | 1 |  |  |  | 1 |
| *Roseburia* AY974841 |  |  |  | 6 | 6 |
| *Ruminococcus* AY916259 |  |  |  | 1 | 1 |
| *Ruminococcus* AY975494 |  |  |  | 1 | 1 |
| *Selenomonas* AY349404 | 4 |  |  |  | 4 |
| *Selenomonas sputigena* |  |  |  | 1 | 1 |
| *Staphylococcus* AF322002 |  |  | 6 | 3 | 9 |
| *Staphylococcus aureus* |  |  | 7 | 37 | 44 |
| *Staphylococcus capitis* | 13 | 5 | 70 | 15 | 103 |
| *Staphylococcus caprae* | 43 | 17 | 18 | 23 | 101 |
| *Staphylococcus cohnii* | 1 |  |  |  | 1 |
| *Staphylococcus epidermidis* | 36 | 10 | 20 | 29 | 95 |
| *Staphylococcus haemolyticus* | 2 | 29 | 7 | 5 | 43 |
| *Staphylococcus hominis* | 20 | 11 | 56 | 120 | 207 |
| *Staphylococcus lugdunensis* |  | 2 |  |  | 2 |
| *Staphylococcus pasteuri* |  | 2 |  |  | 2 |
| *Staphylococcus saccharolyticus* | 7 | 6 |  | 11 | 24 |
| *Staphylococcus simulans* |  |  | 6 |  | 6 |
| *Staphylococcus warneri* | 14 | 4 | 4 | 4 | 26 |
| *Streptococcus* AF429766 |  | 8 |  | 12 | 20 |
| *Streptococcus agalactiae* | 1 |  | 1 | 14 | 16 |
| *Streptococcus anginosus* |  |  |  | 1 | 1 |
| *Streptococcus australis* |  | 1 |  | 6 | 7 |
| *Streptococcus cristatus* | 2 |  |  |  | 2 |
| *Streptococcus* DQ016719 |  |  |  | 1 | 1 |
| *Streptococcus gordonii* | 1 | 3 |  |  | 4 |
| *Streptococcus infantis* | 2 | 1 | 1 | 18 | 22 |
| *Streptococcus intermedius* | 1 | 4 |  |  | 5 |
| *Streptococcus mitis* | 33 | 47 | 7 | 74 | 161 |
| *Streptococcus mutans* |  |  | 3 | 1 | 4 |
| *Streptococcus oralis* |  |  | 2 | 4 | 6 |
| *Streptococcus parasanguinis* | 2 | 5 | 1 | 22 | 30 |
| *Streptococcus pseudopneumoniae* |  | 1 | 1 | 1 | 3 |
| *Streptococcus salivarius* | 10 | 18 | 2 | 30 | 60 |
| *Streptococcus sanguinis* | 19 | 6 | 3 | 3 | 31 |
| *Streptococcus* AY959092 |  | 1 |  | 1 | 2 |
| *Subdoligranulum* AJ408989 |  |  |  | 1 | 1 |
| *Trichococcus pasteurii* |  |  |  | 5 | 5 |
| *Veillonella* DQ087189 |  |  |  | 1 | 1 |
| *Veillonella* AF186071 91% | 1 |  |  |  | 1 |
| *Veillonella atypica* |  |  |  | 2 | 2 |
| *Veillonella dispar* | 2 | 3 |  | 3 | 8 |
| *Veillonella parvula* | 1 |  |  | 7 | 8 |
| **Subtotal** | **290** | **208** | **237** | **605** | **1340** |
| **Fusobacteria**  **(n=4)** | *Fusobacterium* AY278617 |  | 1 |  |  | 1 |
| *Fusobacterium* AJ810271 |  |  |  | 1 | 1 |
|  | *Fusobacterium nucleatum* |  |  |  | 1 | 1 |
| *Leptotrichia* AF432138 |  |  |  | 1 | 1 |
| **Subtotal** |  | **1** |  | **3** | **4** |
| **Planctomycetes**  **(n=1)** | *Blastopirellula* DQ372846 93% |  |  |  | 1 | 1 |
| **Subtotal** |  |  |  | **1** | **1** |
| **Proteobacteria**  **(n=111)** | *Achromobacter xylosoxidans* |  |  |  | 2 | 2 |
| *Acidovorax temperans* | 1 | 7 | 2 | 12 | 22 |
|  | *Acidovorax* AM084006 | 4 | 3 |  | 1 | 8 |
| *Acinetobacter calcoaceticus* |  | 12 |  |  | 12 |
| *Acinetobacter* DQ256337 |  |  |  | 2 | 2 |
| *Acinetobacter* DQ336974 |  |  |  | 6 | 6 |
| *Acinetobacter* DQ337025 |  | 4 |  |  | 4 |
| *Acinetobacter haemolyticus* | 9 |  |  |  | 9 |
| *Acinetobacter johnsonii* | 1 | 2 |  |  | 3 |
| *Acinetobacter junii* | 30 | 4 | 5 | 10 | 49 |
| *Acinetobacter parvus* |  | 1 |  | 2 | 3 |
| *Acinetobacter ursingii* | 5 | 8 |  | 1 | 14 |
| *Acinetobacter* Z93987 |  |  | 1 |  | 1 |
| *Alishewanella* AF371859 |  |  |  | 1 | 1 |
| *Alishewanella fetalis* |  |  | 1 |  | 1 |
| *Alkanindiges* AF513979 93% | 5 |  |  |  | 5 |
| *Alkanindiges* AY251390 94% |  | 3 |  |  | 3 |
| *Amaricoccus* Y09610 94% | 1 |  |  |  | 1 |
| *Aquabacterium* AB128892 | 2 |  |  |  | 2 |
| *Aquabacterium* AY212659 |  | 2 |  | 4 | 6 |
| *Bacteroides ureolyticus* |  |  |  | 1 | 1 |
| *Bdellovibrio* AF148938 88% | 4 |  |  |  | 4 |
| *Bdellovibrio* DQ413094 90% |  | 1 |  |  | 1 |
| *Betaproteobacteria* AY360547 | 3 |  |  |  | 3 |
| *Bosea minatitlanensis* |  |  |  | 1 | 1 |
| *Bradyrhizobiaceae* U87763 | 2 |  |  |  | 2 |
| *Brevundimonas aurantiaca* | 2 |  |  |  | 2 |
| *Brevundimonas vesicularis* | 1 | 2 |  |  | 3 |
| *Burkholderia cenocepacia* |  |  |  | 1 | 1 |
| *Burkholderiales* DQ016727 | 4 |  |  |  | 4 |
| *Burkholderiales* AJ412678 96% | 4 |  |  |  | 4 |
| *Burkholderiales* AY005030 |  |  |  | 1 | 1 |
| *Caulobacteraceae* AJ459874 | 1 |  |  |  | 1 |
| *Citrobacter farmeri* |  |  | 3 | 2 | 5 |
| *Comamonas denitrificans* |  | 1 | 7 | 8 | 16 |
| *Comamonas kerstersii* |  |  |  | 2 | 2 |
| *Delftia acidovorans* |  |  | 9 | 6 | 15 |
| *Devosia* AJ863377 |  | 1 |  |  | 1 |
| *Diaphorobacter nitroreducens* | 7 | 8 | 9 | 12 | 36 |
| *Enhydrobacter aerosaccus* | 34 | 102 | 1 | 10 | 147 |
| *Enterobacter aerogenes* |  | 1 |  |  | 1 |
| *Enterobacter asburiae* | 1 |  |  |  | 1 |
| *Gammaproteobacteria* AY922146 | 1 |  |  |  | 1 |
| *Haemophilus* AY005033 |  | 2 |  |  | 2 |
| *Haemophilus* AY975706 | 5 | 7 | 2 | 11 | 25 |
| *Haemophilus* AF224309 | 2 |  |  |  | 2 |
| *Haemophilus aphrophilus* |  |  |  | 1 | 1 |
| *Haemophilus influenzae* |  |  |  | 10 | 10 |
| *Hydrogenophilus thermoluteolus* |  |  | 1 |  | 1 |
| *Hyphomicrobium facile* | 1 |  |  |  | 1 |
| *Incertae sedis* DQ297980 |  | 1 |  |  | 1 |
| *Janthinobacterium lividum* |  | 1 |  |  | 1 |
| *Lysobacter* AY074793 94% |  | 1 |  |  | 1 |
| *Mesorhizobium* AP003001 95% | 1 |  |  |  | 1 |
| *Methylobacillus* AF289159 94% | 7 |  |  |  | 7 |
| *Methylobacterium* AY592150 | 1 |  |  |  | 1 |
| *Methylobacterium* AY741717 | 1 |  |  |  | 1 |
| *Methylobacterium extorquens* | 1 |  |  |  | 1 |
| *Methylobacterium mesophilicum* | 1 |  |  |  | 1 |
| *Methylobacterium* Z23159 |  | 1 |  |  | 1 |
| *Neisseria* AJ239301 |  | 1 |  | 1 | 2 |
| *Neisseria* AJ786809 |  |  | 2 | 5 | 7 |
| *Neisseria* DQ409137 | 1 |  |  | 1 | 2 |
| *Neisseriaceae* AY225604 91% |  | 1 |  |  | 1 |
| *Neisseriaceae* AY225604 | 18 | 1 |  |  | 19 |
| *Novosphingobium subterraneum* |  | 1 |  |  | 1 |
| *Paracoccus* AJ619068 | 1 |  |  |  | 1 |
| *Paracoccus aminovorans* |  | 1 |  |  | 1 |
| *Paracraurococcus*  AF443585 93% | 1 |  |  |  | 1 |
| *Paracraurococcus* AF443585 95% | 2 |  |  |  | 2 |
| *Pasteurellaceae* AJ290758 | 1 |  |  |  | 1 |
| *Pasteurellaceae* AY005034 | 1 |  |  |  | 1 |
| *Pedomicrobium australicum* | 4 |  |  |  | 4 |
| *Pseudomonas aeruginosa* | 5 |  | 1 | 1 | 7 |
| *Pseudomonas* AF326380 | 1 |  |  |  | 1 |
| *Pseudomonas* AJ312163 |  |  |  | 1 | 1 |
| *Pseudomonas* AJ575816 | 3 |  |  |  | 3 |
| *Pseudomonas azotoformans* |  |  |  | 2 | 2 |
| *Pseudomonas balearica* |  |  |  | 1 | 1 |
| *Pseudomonas costantinii* |  | 1 |  | 2 | 3 |
| *Pseudomonas* DQ130043 | 4 |  |  | 1 | 5 |
| *Pseudomonas koreensis* |  |  |  | 1 | 1 |
| *Pseudomonas monteilii* |  | 1 | 4 | 3 | 8 |
| *Pseudomonas plecoglossicida* |  |  | 2 | 2 | 4 |
| *Pseudomonas pseudoalcaligenes* |  |  |  | 1 | 1 |
| *Pseudomonas putida* |  |  | 1 | 1 | 2 |
| *Pseudomonas saccharophila* | 12 | 8 |  |  | 20 |
| *Pseudomonas stutzeri* | 21 | 6 | 7 | 2 | 36 |
| *Pseudomonas tremae* | 3 |  |  |  | 3 |
| *Ralstonia insidiosa* |  | 1 |  |  | 1 |
| *Ralstonia pickettii* |  |  |  | 4 | 4 |
| *Rhizobiales* AB121772 96% | 2 |  |  |  | 2 |
| *Rhizobiales* AF358012 | 1 |  |  |  | 1 |
| *Rhizobium giardinii* |  | 2 |  |  | 2 |
| *Rhodocyclaceae* AY953150 |  |  |  | 2 | 2 |
| *Serratia liquefaciens* | 4 |  |  |  | 4 |
| *Serratia marcescens subsp. sakuensis* | 2 |  |  |  | 2 |
| *Shigella dysenteriae* |  | 1 | 1 |  | 2 |
| *Shigella flexneri* |  |  | 2 | 7 | 9 |
| *Sphingobium amiense* | 2 |  |  |  | 2 |
| *Sphingomonas* AJ555475 |  | 1 |  |  | 1 |
| *Sphingomonas anadarae* |  |  |  | 3 | 3 |
| *Sphingomonas oligophenolica* |  | 2 |  |  | 2 |
| *Sphingomonas yabuuchiae* |  | 1 |  |  | 1 |
| *Sphingomonas taejonensis* |  | 2 |  |  | 2 |
| *Sphingopyxis* AY328823 | 2 | 1 |  |  | 3 |
| *Stenotrophomonas acidaminiphila* |  |  |  | 1 | 1 |
| *Stenotrophomonas maltophilia* | 1 |  |  | 2 | 3 |
| *Wautersia metallidurans* |  | 2 | 1 |  | 3 |
| *Xanthomonadaceae* AJ619045 94% | 3 |  |  |  | 3 |
| *Xanthomonadaceae* AB008508 |  | 1 |  |  | 1 |
| **Subtotal** | **237** | **210** | **62** | **151** | **660** |
| **Thermomicrobia**  **(n=1)** | *Thermomicrobium* AY250886 93% | 1 |  |  |  | 1 |
| **Subtotal** | **1** |  |  |  | **1** |
| **TM7**  **(n=6)** | *TM7* AY349415 |  | 1 |  |  | 1 |
| *TM7* AF385520 |  |  |  | 1 | 1 |
|  | *TM7* AY005446 |  |  |  | 2 | 2 |
| *TM7* DQ248299 95% |  | 2 |  |  | 2 |
| *TM7* AF385500 |  | 2 |  |  | 2 |
| *TM7* AB195911 94% |  | 1 |  |  | 1 |
| **Subtotal** |  | **6** |  | **3** | **9** |
| **Unclassified**  **(n=2)** | Bacteria AJ619064 87% | 1 |  |  |  | 1 |
| Bacteria AJ619064 | 8 | 1 |  |  | 9 |
|  | **Subtotal** | **9** | **1** |  |  | **10** |
| **Total** | | **1,221** | **817** | **611** | **1,314** | **3,963** |
| **Number of SLOTU** | | **182** | **130** | **95** | **188** | **366** |

aNNT1: 12 samples from six healthy people, reported in a prior study (11).

bNNT2: An additional eight samples from four of the six healthy people were collected 8-

10 months later.

cPN: Six samples from normal skin from the six patients with psoriasis.

dPP: 13 samples from psoriatic lesions from the six patients with psoriasis.
